# Supplementary material
Source: PubMed Central journal article supplement (PMC3378132)

# EMBO Molecular Medicine

EMBO Molecular Medicine  
European Molecular Biology Organization  
Meyerohofstrasse 1  
69117 Heidelberg  
Germany

Phone: +49 6221 8891310  
Fax: +49 6221 8891240  
E-mail: info@embomolmed.org  
Website: www.embomolmed.org

## COLOR CHARGE AGREEMENT

Manuscript No. EMM-2009-00114

Corresponding Author Nancy Ratner

Title Integrative genomic analyses of neurofibromatosis tumors ...

Thank you very much for the color figures that you sent to illustrate your manuscript. As you know, we do ask our authors to contribute towards the extra cost incurred for the reproduction of color. The prices (incl. VAT) are listed below.

|                 |              |
|-----------------|--------------|
| 1 color figure  | 595.00 Euro  |
| 2 color figures | 990.00 Euro  |
| 3 color figures | 1485.00 Euro |
| 4 color figures | 1980.00 Euro |

For German sales tax purposes the charge for color prints is considered a service and, therefore, is subject to German sales tax. The presentation of a VAT identification number does not, in this case, have an influence on the taxability of this transaction.

For 5 and more color figures please contact our Production Department for an individual offer at: mblaschke@wiley.com

I hereby state that I agree to pay the publication charges to Wiley-VCH as indicated above

Subject to prior approval by the editor, authors may elect to have colour reproduction of figures restricted to the online version of their article.

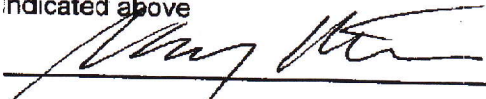  
Date, Signature

All authors are requested to complete the accompanying form, indicating per figure which mode of reproduction is required

Purchase Order No.:  
31 00131646

**Terms of payment:**  
 Please send an Invoice     Cheque is enclosed  
 Please charge my credit card

   
    
    
Expiry date:  /  /

Card no.

Date, Signature \_\_\_\_\_

Bill to: \_\_\_\_\_  
\_\_\_\_\_  
\_\_\_\_\_  
\_\_\_\_\_

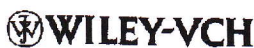

Wiley-VCH Verlag GmbH & Co. KGaA  
Location of the Company: Weinheim; Chairman of the Supervisory Board: Stephen Michael Smith;  
Trade Register: Mannheim, HRB 432833;  
General Partner: John Wiley & Sons GmbH, Location: Weinheim; Trade Register Mannheim, HRB 432295;  
Managing Directors: Christopher J. Dicks, Bijan Ghawami, William Pesce

# EMBO Molecular Medicine

EMBO Molecular Medicine  
European Molecular Biology Organization  
Meyerhofstrasse 1  
69117 Heidelberg  
Germany

Phone: +49 6221 8891-310  
Fax: +49 6221 8891-240  
E-mail: info@embomolmed.org  
Website: www.embomolmed.org

## COLOR CHARGE AGREEMENT - Page 2

Manuscript No.:

EMM-2009-00114-V2

Corresponding Author:

NANCY RATNER

Title:

Integrative genomic analyses of neuroblastoma tumors..

**IMPORTANT!** This form must be completed for all papers containing colour artwork. We are unable to proof and publish your paper until we receive these instructions

| Figure Number corresponding to your manuscript | Black and White reproduction in print and online - FREE<br>Place 'X' | Colour online only reproduction (pdf and html full text version) -FREE<br>Place 'X' | Colour reproduction in print and online - CHARGES<br>Place 'X' |
|------------------------------------------------|----------------------------------------------------------------------|-------------------------------------------------------------------------------------|----------------------------------------------------------------|
| 1 Figure 1                                     |                                                                      |                                                                                     |                                                                |
| 2 Table 1                                      |                                                                      |                                                                                     | X                                                              |
| 3 Figure 2                                     |                                                                      |                                                                                     | X                                                              |
| 4 3                                            |                                                                      |                                                                                     | X                                                              |
| 5 4                                            | X                                                                    |                                                                                     |                                                                |
| 6 5                                            |                                                                      |                                                                                     | X                                                              |
| 7                                              |                                                                      |                                                                                     |                                                                |
| 8 Supplemental Tables                          | all B/W except 1                                                     | X                                                                                   |                                                                |
| 9                                              |                                                                      |                                                                                     |                                                                |
| 10                                             |                                                                      |                                                                                     |                                                                |
| Total figures of each type                     |                                                                      |                                                                                     |                                                                |
| Cost                                           | N/A                                                                  | N/A                                                                                 |                                                                |
| Total                                          |                                                                      |                                                                                     |                                                                |

Signature:

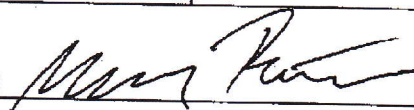

Date

5-11-09

Print name:

NANCY RATNER

E-mail:

nancy.ratner@cchmc.org

Return to: EMBO Molecular Medicine, Meyerhofstrasse 1, D-69117 Heidelberg, Germany.

Tel: +49 6221 8891 310; Fax: +49 6221 889 240, E-mail: contact@embomolmed.org

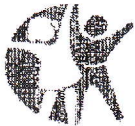

**Cincinnati Children's**  
Hospital Medical Center

3333 Burnet Ave.  
Cincinnati OH 45229  
United States

**Vendor:** 0000014205  
Wiley - VCH Verlag GMBH & Co.  
Boschstrabe 12  
Weinheim D69469  
Germany

**Purchase Order**

**CHANGE ORDER**

Dispatch via Print

|                                     |                                          |                                 |                            |
|-------------------------------------|------------------------------------------|---------------------------------|----------------------------|
| <b>Purchase Order</b><br>3100131646 | <b>Date</b><br>05/11/2009                | <b>Revision</b><br>1-05/12/2009 | <b>Page</b><br>1           |
| <b>Payment Terms</b><br>Net 25      | <b>Freight Terms</b><br>FOB Deest FR ADD |                                 | <b>Ship Via</b><br>BestWay |
| <b>Buyer</b><br>Michelle Hill       | <b>Phone</b><br>513 6368833              |                                 | <b>Fax</b><br>513 6363453  |

**Ship To:** CCHMC Main Receiving Dock 5 - Research Orders  
3333 Burnet Avenue  
Cincinnati OH 45229-3039  
United States

**Bill To:** Accounts Payable MLC 5000  
3333 Burnet Ave.  
Cincinnati OH 45229  
United States

**ALL ORDERS REQUIRE CONFIRMATION TO AVOID INVOICING ISSUES. PLEASE PROVIDE PO CONFIRMATION TO THE ABOVE LISTED FAX NUMBER. THANK YOU.**

Tax Exempt? Y Tax Exempt ID: 31025692 Replenishment Option: Standard

| Line-Sch | Item/Description                          | Mfg ID | Quantity | UOM | PO Price | Extended Amt | Due Date   |
|----------|-------------------------------------------|--------|----------|-----|----------|--------------|------------|
| 1-1      | EMM-2009-00114<br>manuscript color prints |        | 1.00     | EA  | 2,975.56 | 2,975.56     | 05/11/2009 |

|                        |                 |
|------------------------|-----------------|
| Schedule Total         | 2,975.56        |
| Item Total             | 2,975.56        |
| <b>Total PO Amount</b> | <b>2,975.56</b> |

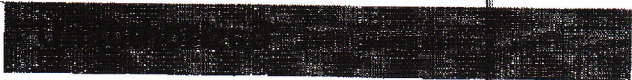

Supplement: emmm0001-0236-SD14.pdf [file emmm0001-0236-SD14.pdf]
