# Supplementary material
Source: PubMed Central journal article supplement (PMC3378132)
Supplement: emmm0001-0236-SD6.pdf [file emmm0001-0236-SD6.pdf]

**Supplementary Table 6.** Differential and statistically significant biological themes

(clusters C6 – C11).

| Cluster | Transcript # | Expression Pattern                                                                         | Biological Theme                                                                                                                                | Example Genes                                                                                                                                                                                           |
|---------|--------------|--------------------------------------------------------------------------------------------|-------------------------------------------------------------------------------------------------------------------------------------------------|---------------------------------------------------------------------------------------------------------------------------------------------------------------------------------------------------------|
| C6      | 350          | Down in all, variable in class 1 NFSCs and some neurofibromas                              | Cell surface receptor linked signal transduction, Cytoskeleton organization and biogenesis, Glycoprotein metabolism, Nervous system development | ADAM23, CNP, DNAH9, EDG3, GAP43, GDF8, GFRA1, GFRA2, GFRA3, GIT1, GNG2, GPR126, IFNAR2, ITGA6, ITGB8, KLK6, L1CAM, LEF1, MBP, MERTK, METRN, NCK2, NGFR, NPY5R, NRCAM, NTRK3, PAX3, RHOJ, SEMA3B, SEMA6A |
| C7      | 443          | Down in all except class 1 NFSCs, variable in class 2NFSCs and some neurofibromas          | Sphingolipid metabolism, Neurogenesis                                                                                                           | BRSK1, FEZ1, FEZ2, LARGE, NRP2, NTNG1, PHCA, SERINC1, ST8SIA5, UGT8                                                                                                                                     |
| C8      | 355          | Down in most MPNST cell lines, variable in MPNSTs and class 2 NFSCs                        | Cell adhesion, Nervous system development                                                                                                       | ARHGAP5, AZGP1, CDH19, COL14A1, EDNRB, EFS, FEZ1, GAS7, GPM6B, HDAC4, HNT, HSPG2, ITGB1BP1, ITGB7, KLK8, MAL, MPZ, NLGN4X, PCDH20, PMP2, PMP22, PPFIBP1, PTPRZ1, S100B, SORBS1, SOX8, TLN2              |
| C9      | 260          | Up in MPNST cell lines and MPNST                                                           | Chromosome organization and biogenesis, Extracellular matrix organization and biogenesis, Morphogenesis, Nervous system development             | CDC42EP4, COL4A6, DMRT1, DNER, EPHB2, EPHB4, EYA4, F2R, FOXE1, FOXG1B, FZD2, H2AFY2, HIST1H2BD, HMGA2, HMGB2, HOXC13, MDK, PAX6, SEMA3A, SOX11, ZIC1, ZIC2                                              |
| C10     | 128          | Up in all, variable in class 1 NFSCs                                                       | Cell adhesion, Intracellular signaling cascade, JAK-STAT signaling pathway, Skeletal development                                                | ARHGAP6, ARHGDIB, CASP1, CD36, DAPK1, DCAMKL1, EGFR, ETS2, FGFR1, HMCN1, LEPR, MAP3K5, NOG, SHOX2, SOCS3, SPRY1, SPRY4, STAT5B                                                                          |
| C11     | 172          | Up class 2 NFSCs, MPNST cell lines and MPNSTs, variable in class 1 NFSCs and neurofibromas | Cell adhesion, Morphogenesis, Skeletal development, Wnt receptor signaling pathway                                                              | AMIGO2, CDH11, CDH13, COL6A1, COL6A2, COL6A3, DACT1, EN1, FBN2, FZD7, IGFBP3, ITGB5, LPXN, PAPSS2, PCDH18, PITX2, ROBO1, SOX9, TBX3, THY1, TLE4, TPBG, TWIST1, TWIST2, WNT5A, WNT5B                     |
