# Supplementary material
Source: PubMed Central journal article supplement (PMC3378132)
Supplement: emmm0001-0236-SD8.pdf [file emmm0001-0236-SD8.pdf]

**Supplementary Table 8.** Sox9 target genes in transcripts similarly differentially

expressed in Schwann cell cultures and tumors.

| Refseq ID    | Common   | Description                                                                          |
|--------------|----------|--------------------------------------------------------------------------------------|
| NM_018677    | ACSS2    | acyl-CoA synthetase short-chain family member 2 (ACSS2), transcript variant 1, mRNA  |
| NM_018677    | ACSS2    | acyl-CoA synthetase short-chain family member 2 (ACSS2), transcript variant 2, mRNA  |
| NM_017637    | BNC2     | basonuclin 2 (BNC2), mRNA                                                            |
| NM_001038707 | CDC42SE1 | CDC42 small effector 1 (CDC42SE1), transcript variant 1, mRNA                        |
| NM_001038707 | CDC42SE1 | CDC42 small effector 1 (CDC42SE1), transcript variant 2, mRNA                        |
| NM_001257    | CDH13    | cadherin 13, H-cadherin (heart) (CDH13), mRNA                                        |
| NM_003805    | CRADD    | CASP2 and RIPK1 domain containing adaptor with death domain (CRADD), mRNA            |
| NM_001387    | DPYSL3   | dihydropyrimidinase-like 3 (DPYSL3), mRNA                                            |
| NM_022140    | EPB41L4A | erythrocyte membrane protein band 4.1 like 4A (EPB41L4A), mRNA                       |
| NM_004100    | EYA4     | eyes absent homolog 4 (Drosophila) (EYA4), transcript variant 1, mRNA                |
| NM_004100    | EYA4     | eyes absent homolog 4 (Drosophila) (EYA4), transcript variant 2, mRNA                |
| NM_004100    | EYA4     | eyes absent homolog 4 (Drosophila) (EYA4), transcript variant 4, mRNA                |
| NM_018013    | FLJ10159 | hypothetical protein FLJ10159 (FLJ10159), mRNA                                       |
| NM_024574    | FLJ23191 | hypothetical protein FLJ23191 (FLJ23191), mRNA                                       |
| NM_207371    | FLJ45187 | hypothetical protein LOC387640 (FLJ45187), mRNA                                      |
| NM_013281    | FLRT3    | fibronectin leucine rich transmembrane protein 3 (FLRT3), transcript variant 1, mRNA |
| NM_013281    | FLRT3    | fibronectin leucine rich transmembrane protein 3 (FLRT3), transcript variant 2, mRNA |
| NM_005253    | FOSL2    | FOS-like antigen 2 (FOSL2), mRNA                                                     |
| NM_005264    | GFRA1    | GDNF family receptor alpha 1 (GFRA1), transcript variant 1, mRNA                     |
| NM_005264    | GFRA1    | GDNF family receptor alpha 1 (GFRA1), transcript variant 2, mRNA                     |
| NM_024827    | HDAC11   | histone deacetylase 11 (HDAC11), mRNA                                                |

|              |           |                                                                                                                                                                                              |
|--------------|-----------|----------------------------------------------------------------------------------------------------------------------------------------------------------------------------------------------|
| NM_004504    | HRB       | HIV-1 Rev binding protein (HRB), mRNA                                                                                                                                                        |
| NM_006546    | IGF2BP1   | insulin-like growth factor 2 mRNA binding protein 1 (IGF2BP1), mRNA                                                                                                                          |
| NM_002202    | ISL1      | ISL1 transcription factor, LIM/homeodomain, (islet-1) (ISL1), mRNA                                                                                                                           |
| NM_002224    | ITPR3     | inositol 1,4,5-triphosphate receptor, type 3 (ITPR3), mRNA                                                                                                                                   |
| NM_004504    | LOC649094 | PREDICTED: similar to Nucleoporin-like protein RIP (HIV-1 Rev-binding protein) (Rev interacting protein) (Rev/Rex activation domain-binding protein), transcript variant 1 (LOC649094), mRNA |
| NM_005576    | LOXL1     | lysyl oxidase-like 1 (LOXL1), mRNA                                                                                                                                                           |
| NM_015516    | LRRC54    | leucine rich repeat containing 54 (LRRC54), mRNA                                                                                                                                             |
| NM_002371    | MAL       | mal, T-cell differentiation protein (MAL), transcript variant a, mRNA                                                                                                                        |
| NM_002371    | MAL       | mal, T-cell differentiation protein (MAL), transcript variant b, mRNA                                                                                                                        |
| NM_002371    | MAL       | mal, T-cell differentiation protein (MAL), transcript variant c, mRNA                                                                                                                        |
| NM_002371    | MAL       | mal, T-cell differentiation protein (MAL), transcript variant d, mRNA                                                                                                                        |
| NM_006174    | NPY5R     | neuropeptide Y receptor Y5 (NPY5R), mRNA                                                                                                                                                     |
| NM_000438    | PAX3      | paired box gene 3 (Waardenburg syndrome 1) (PAX3), transcript variant PAX3, mRNA                                                                                                             |
| NM_000438    | PAX3      | paired box gene 3 (Waardenburg syndrome 1) (PAX3), transcript variant PAX3A, mRNA                                                                                                            |
| NM_000438    | PAX3      | paired box gene 3 (Waardenburg syndrome 1) (PAX3), transcript variant PAX3D, mRNA                                                                                                            |
| NM_000438    | PAX3      | paired box gene 3 (Waardenburg syndrome 1) (PAX3), transcript variant PAX3E, mRNA                                                                                                            |
| NM_000438    | PAX3      | paired box gene 3 (Waardenburg syndrome 1) (PAX3), transcript variant PAX3H, mRNA                                                                                                            |
| NM_020845    | PITPNM2   | phosphatidylinositol transfer protein, membrane-associated 2 (PITPNM2), mRNA                                                                                                                 |
| NM_003622    | PPFIBP1   | PTPRF interacting protein, binding protein 1 (liprin beta 1) (PPFIBP1), transcript variant 1, mRNA                                                                                           |
| NM_003622    | PPFIBP1   | PTPRF interacting protein, binding protein 1 (liprin beta 1) (PPFIBP1), transcript variant 2, mRNA                                                                                           |
| NM_001010935 | RAP1A     | RAP1A, member of RAS oncogene family (RAP1A), transcript variant 1, mRNA                                                                                                                     |

|              |          |                                                                                                       |
|--------------|----------|-------------------------------------------------------------------------------------------------------|
| NM_001010935 | RAP1A    | RAP1A, member of RAS oncogene family (RAP1A), transcript variant 2, mRNA                              |
| NM_002920    | RFX4     | regulatory factor X, 4 (influences HLA class II expression) (RFX4), transcript variant 1, mRNA        |
| NM_002920    | RFX4     | regulatory factor X, 4 (influences HLA class II expression) (RFX4), transcript variant 3, mRNA        |
| NM_002957    | RXRA     | retinoid X receptor, alpha (RXRA), mRNA                                                               |
| NM_021818    | SAV1     | salvador homolog 1 (Drosophila) (SAV1), mRNA                                                          |
| NM_006080    | SEMA3A   | sema domain, immunoglobulin domain (Ig), short basic domain, secreted, (semaphorin) 3A (SEMA3A), mRNA |
| NM_014631    | SH3PXD2A | SH3 and PX domains 2A (SH3PXD2A), mRNA                                                                |
| NM_003030    | SHOX2    | short stature homeobox 2 (SHOX2), transcript variant SHOX2a, mRNA                                     |
| NM_003030    | SHOX2    | short stature homeobox 2 (SHOX2), transcript variant SHOX2b, mRNA                                     |
| NM_005982    | SIX1     | sine oculis homeobox homolog 1 (Drosophila) (SIX1), mRNA                                              |
| NM_003106    | SOX2     | SRY (sex determining region Y)-box 2 (SOX2), mRNA                                                     |
| NM_016169    | SUFU     | suppressor of fused homolog (Drosophila) (SUFU), mRNA                                                 |
| NM_016525    | UBAP1    | ubiquitin associated protein 1 (UBAP1), mRNA                                                          |
| NM_015374    | UNC84B   | unc-84 homolog B (C. elegans) (UNC84B), mRNA                                                          |
