# Supplementary material
Source: PubMed Central journal article supplement (PMC3378132)
Supplement: emmm0001-0236-SD13.pdf [file emmm0001-0236-SD13.pdf]

For more information:

<http://www.ctf.org/>

[www.ncbi.nlm.nih.gov/entrez/dispomim.cgi?id=162200](http://www.ncbi.nlm.nih.gov/entrez/dispomim.cgi?id=162200)
